# Supplementary material for: Beyond energy balance in agrivoltaic food production: Emergent crop traits from wavelength-selective solar cells
Source: bioRxiv or medRxiv preprint supplement (doi:10.1101/2022.03.10.482833), 2022-07-12
Supplement: Supplementary file [file media-6.pdf]

royalblue

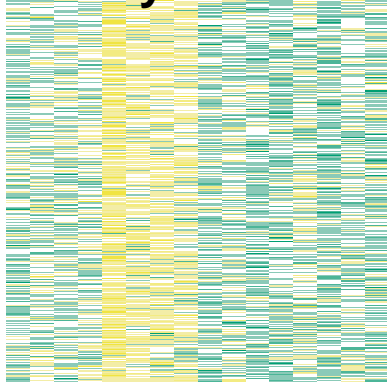

CP1

CP3

FIP1

FIP3

FPP1

FPP3

PIP1

PIP3

eigengene expression

-0.2 0.2 0.6

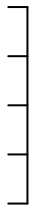

PC Experiment

royalblue

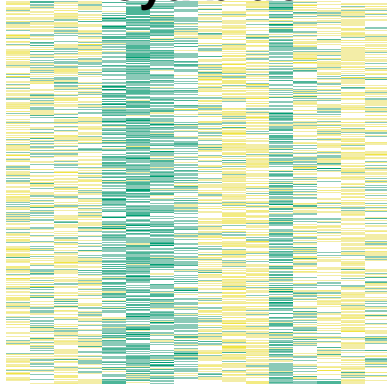

C1

C3

FI1

FI3

FP1

FP3

PI1

PI3

eigengene expression

-0.4 0.0

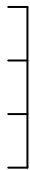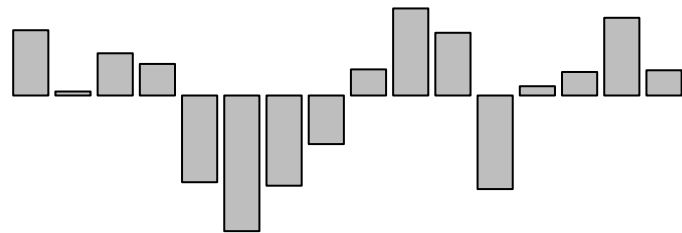

HC Experiment

**yellow**

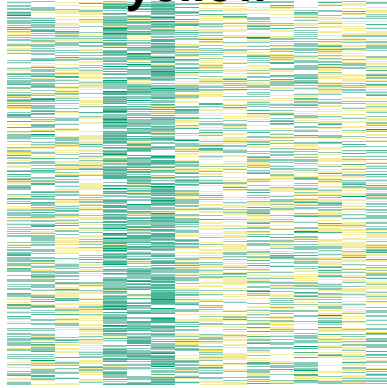

CP1

CP3

FIP1

FIP3

FPP1

FPP3

PIP1

PIP3

eigengene expression

-0.5 -0.1 0.2

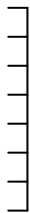

PC Experiment

yellow

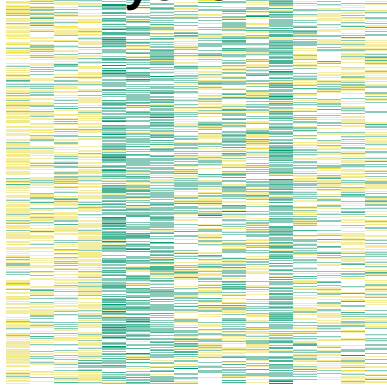

C1

C3

F11

F13

FP1

FP3

P11

P13

eigengene expression

0.4  
0.0  
-0.4

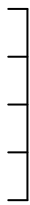

HC Experiment



**turquoise**

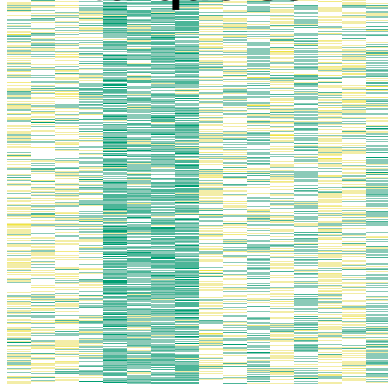

CP1

CP3

FIP1

FIP3

FPP1

FPP3

PIP1

PIP3

eigengene expression

-0.4  
-0.1  
0.2

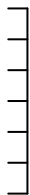

PC Experiment

**turquoise**

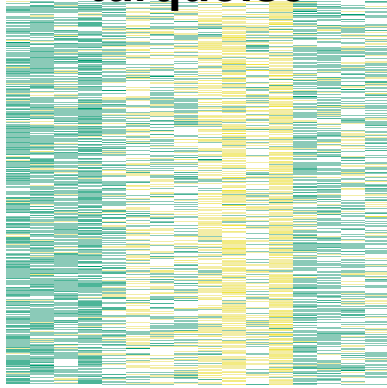

C1

C3

F11

F13

FP1

FP3

P11

P13

eigengene expression

-0.2 0.2

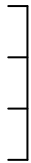

HC Experiment

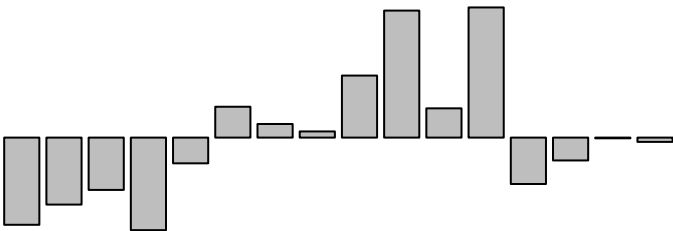

CP1

CP3

FIP1

FIP3

FPP1

FPP3

PIP1

PIP3

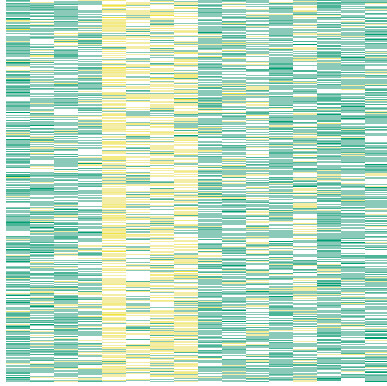

eigengene expression

-0.2 0.2

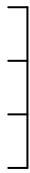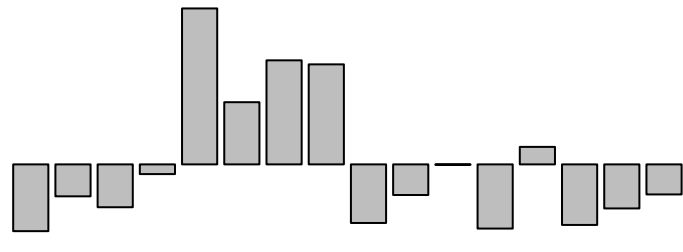

PC Experiment

C1  
C3  
F11  
F13  
FP1  
FP3  
P11  
P13

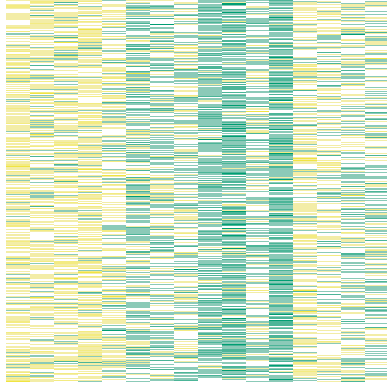

eigengene expression

-0.4  
0.0

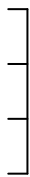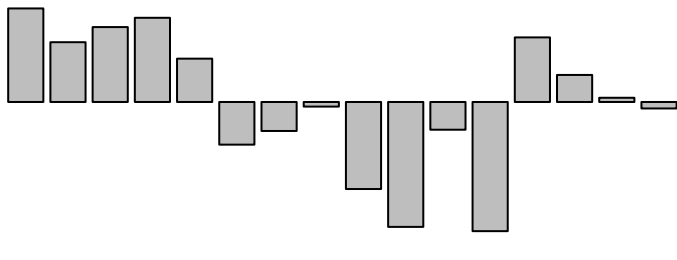

HC Experiment



# darkorange

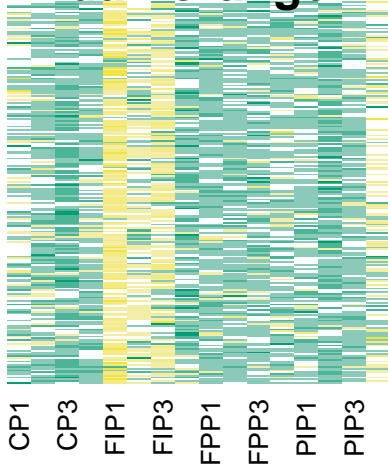

eigengene expression

0.6  
0.2  
-0.2

PC Experiment

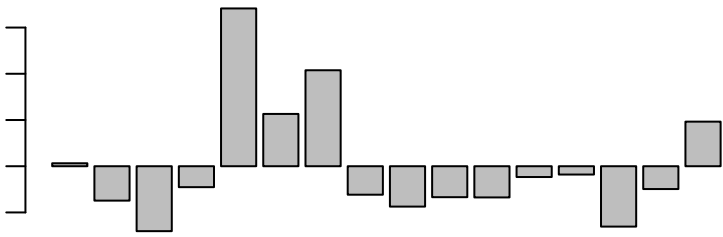

# darkorange

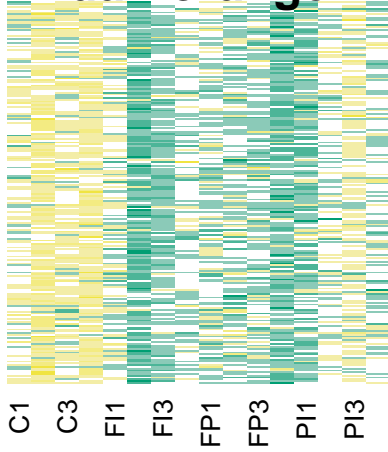

eigengene expression

0.4  
0.0  
-0.4

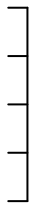

HC Experiment

darkgrey

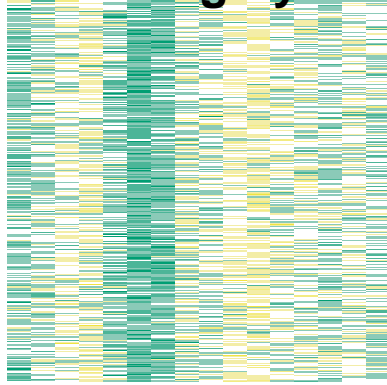

CP1

CP3

FIP1

FIP3

FPP1

FPP3

PIP1

PIP3

eigengene expression

-0.4 0.0

PC Experiment

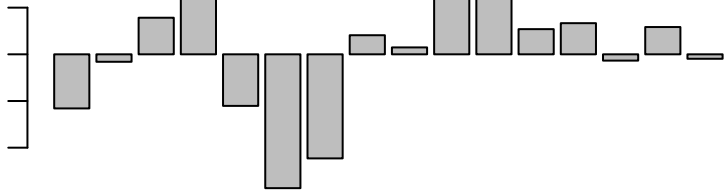

**darkgrey**

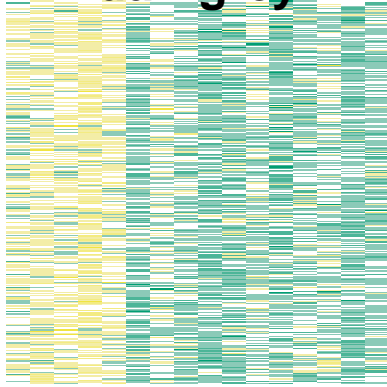

C1

C3

F11

F13

FP1

FP3

P11

P13

eigengene expression

0.2  
-0.2

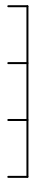

HC Experiment



**pink**

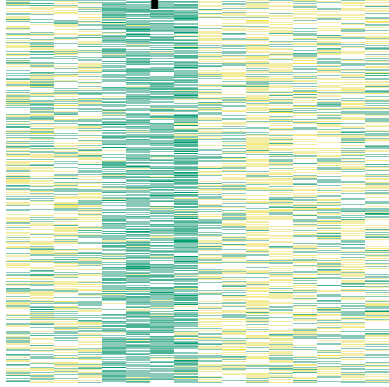

CP1

CP3

FIP1

FIP3

FPP1

FPP3

PIP1

PIP3

eigengene expression

0.0  
-0.4

PC Experiment

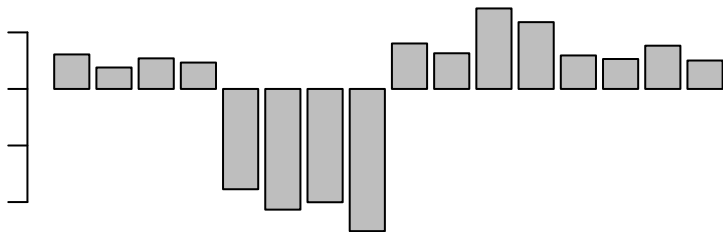

**pink**

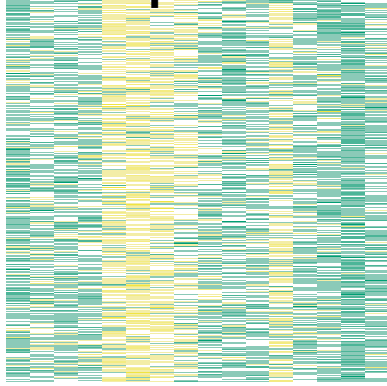

C1

C3

F11

F13

FP1

FP3

P11

P13

eigengene expression

0.2  
-0.2

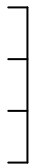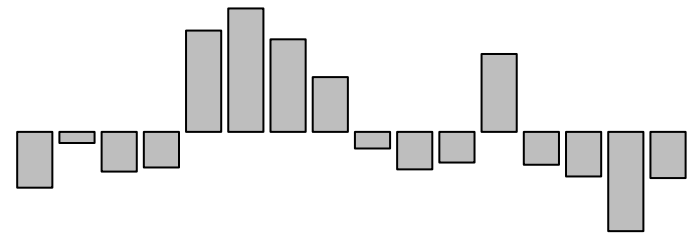

HC Experiment

# steelblue

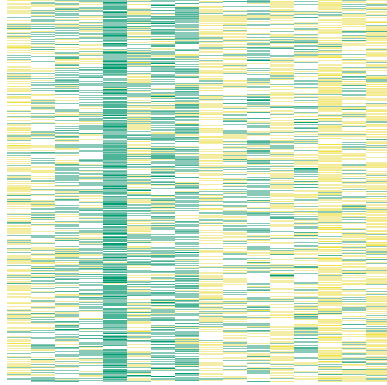

CP1

CP3

FIP1

FIP3

FPP1

FPP3

PIP1

PIP3

eigengene expression

0.0  
-0.6

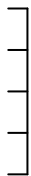

PC Experiment

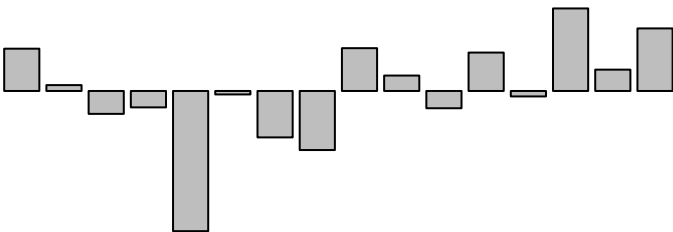

**steelblue**

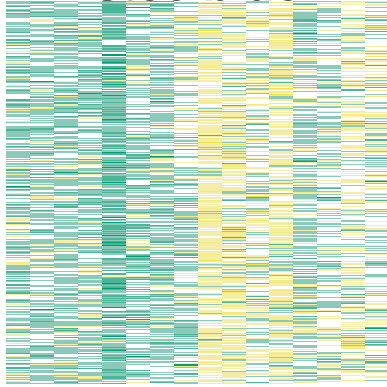

C1

C3

F11

F13

FP1

FP3

P11

P13

eigengene expression

-0.4  
0.0  
0.4

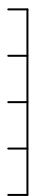

HC Experiment



**magenta**

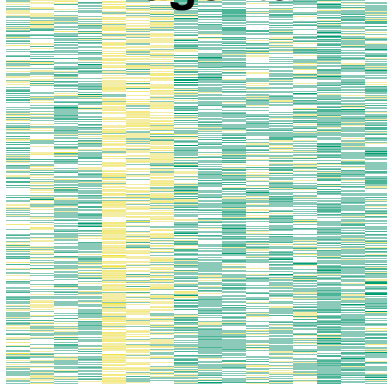

CP1

CP3

FIP1

FIP3

FPP1

FPP3

PIP1

PIP3

eigengene expression

0.6  
0.2  
-0.2

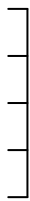

PC Experiment

magenta

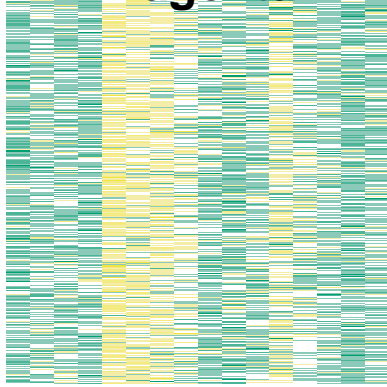

C1

C3

F11

F13

FP1

FP3

P11

P13

eigengene expression

-0.2  
0.2

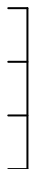

HC Experiment

**greenyellow**

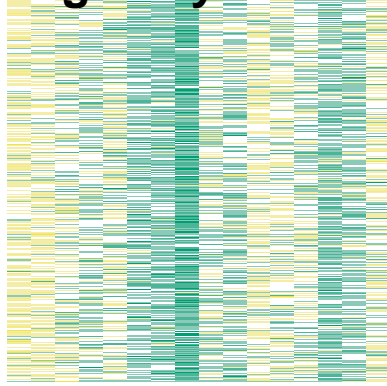

CP1

CP3

FIP1

FIP3

FPP1

FPP3

PIP1

PIP3

eigengene expression

0.2  
-0.2  
-0.6

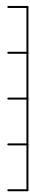

PC Experiment

**greenyellow**

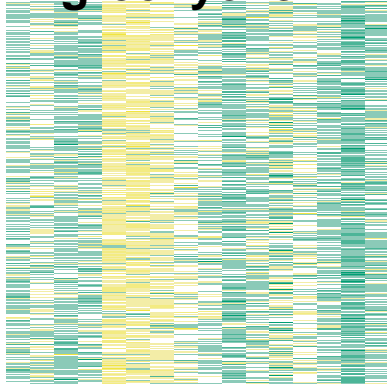

C1

C3

F11

F13

FP1

FP3

P11

P13

eigengene expression

-0.4  
0.0  
0.4

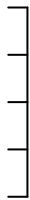

HC Experiment



# darkorange2

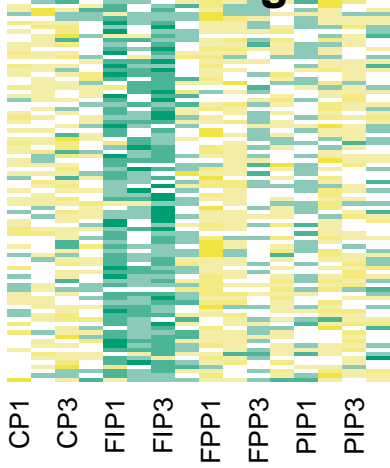

eigengene expression

-0.4  
0.0

PC Experiment

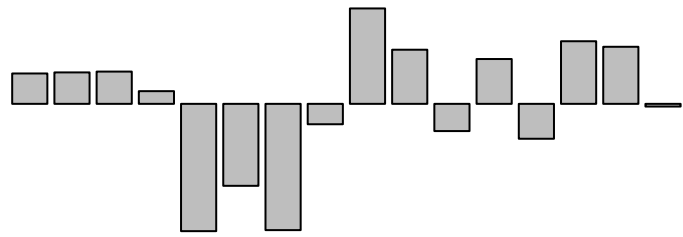

# darkorange2

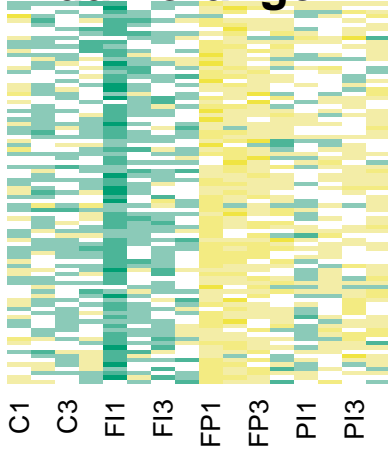

eigengene expression

-0.4  
0.0  
0.4

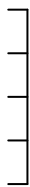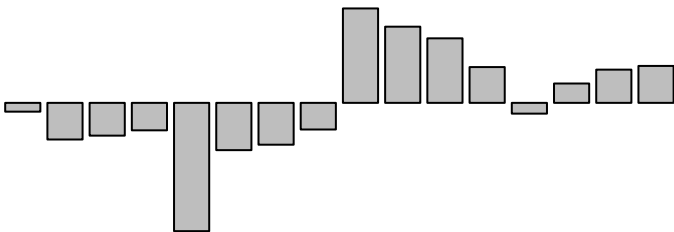

HC Experiment

**brown**

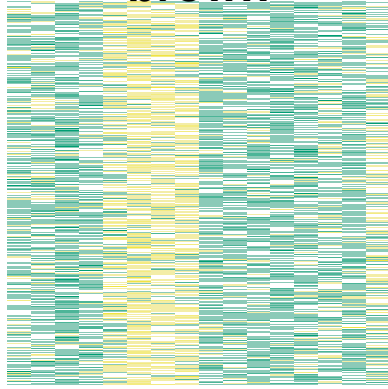

CP1

CP3

FIP1

FIP3

FPP1

FPP3

PIP1

PIP3

eigengene expression

-0.2 0.2

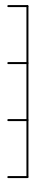

PC Experiment

**brown**

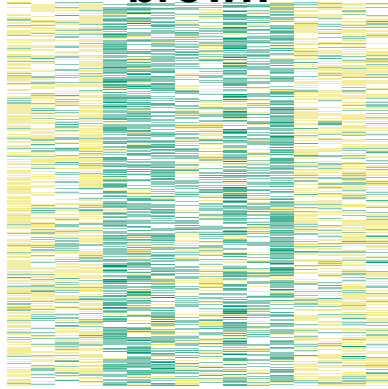

C1

C3

F11

F13

FP1

FP3

P11

P13

eigengene expression

0.3  
0.0  
-0.3

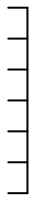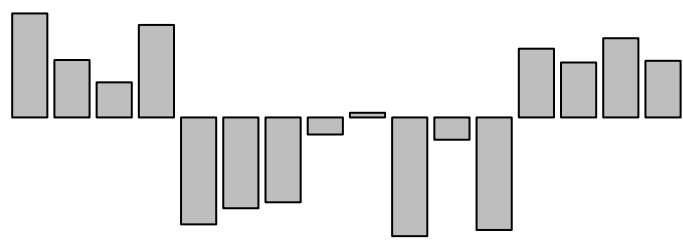

HC Experiment



**black**

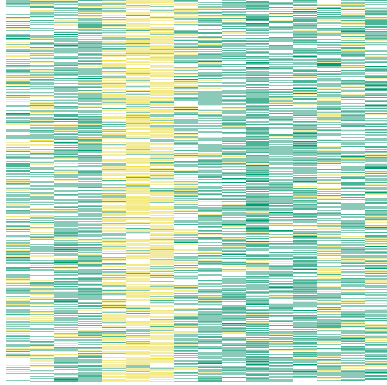

CP1

CP3

FIP1

FIP3

FPP1

FPP3

PIP1

PIP3

eigengene expression

0.2  
-0.2

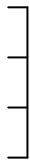

PC Experiment

**black**

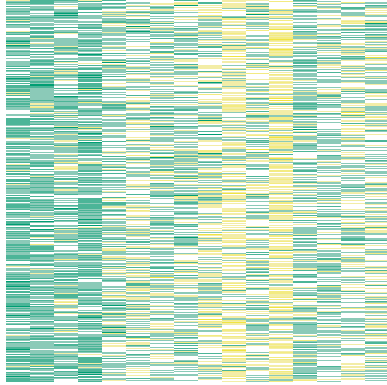

C1

C3

F11

F13

FP1

FP3

P11

P13

eigengene expression

-0.4  
0.0  
0.4

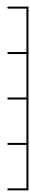

HC Experiment

midnightblue

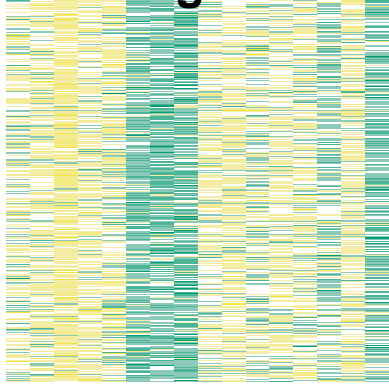

CP1

CP3

FIP1

FIP3

FPP1

FPP3

PIP1

PIP3

eigengene expression

0.4  
0.0  
-0.4

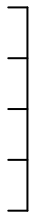

PC Experiment

midnightblue

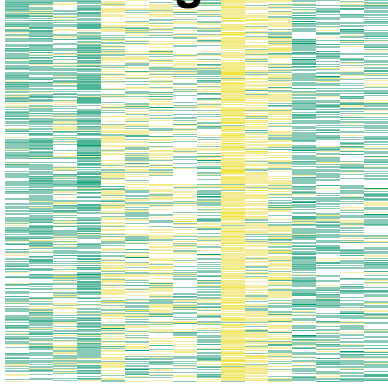

C1

C3

F11

F13

FP1

FP3

P11

P13

eigengene expression

-0.2 0.2 0.6

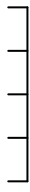

HC Experiment



lightcyan

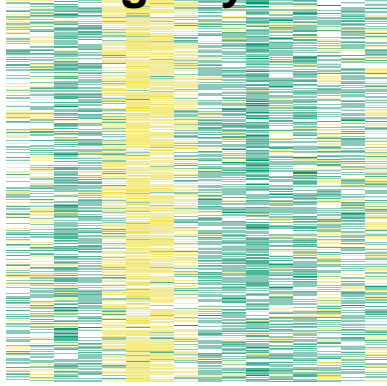

CP1

CP3

FIP1

FIP3

FPP1

FPP3

PIP1

PIP3

eigengene expression

0.2  
-0.2

PC Experiment

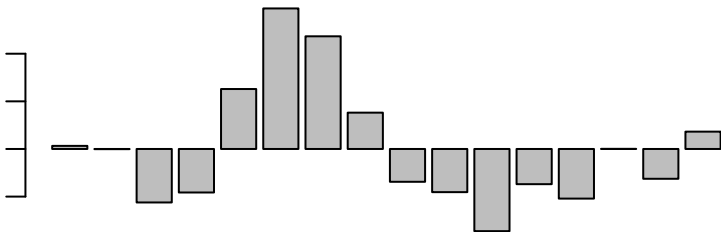

lightcyan

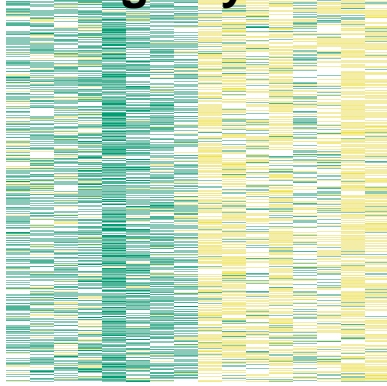

C1

C3

F11

F13

FP1

FP3

P11

P13

eigengene expression

-0.4 0.0

HC Experiment

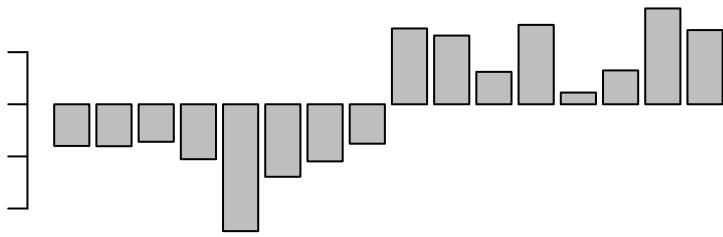

white

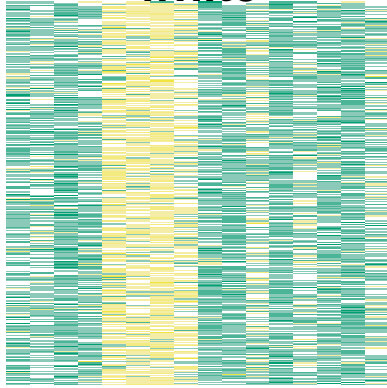

CP1

CP3

FIP1

FIP3

FPP1

FPP3

PIP1

PIP3

eigengene expression

-0.2 0.1 0.4

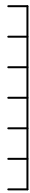

PC Experiment

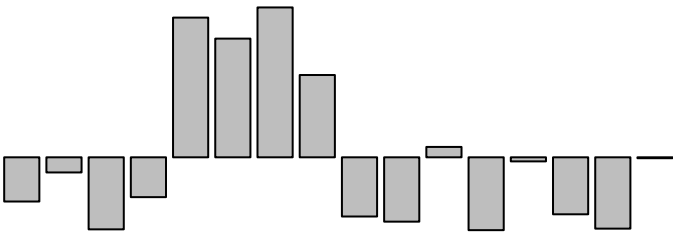

**white**

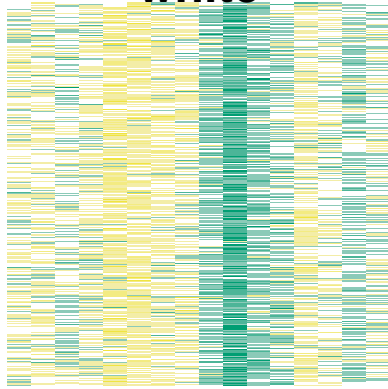

C1

C3

F11

F13

FP1

FP3

P11

P13

eigengene expression

0.0  
-0.6

HC Experiment

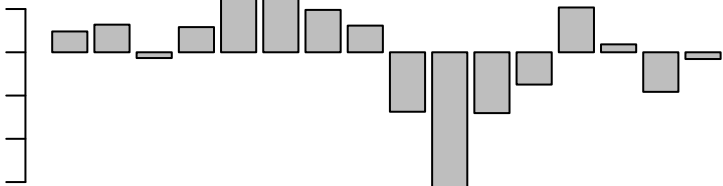



# mediumpurple3

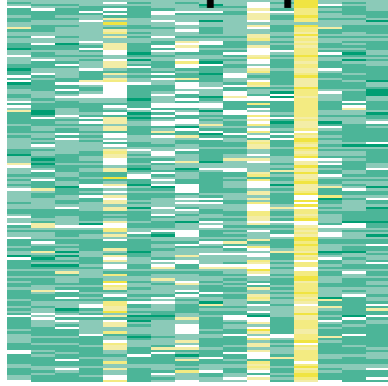

CP1

CP3

FIP1

FIP3

FPP1

FPP3

PIP1

PIP3

eigengene expression

0.8  
0.4  
0.0

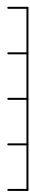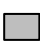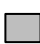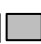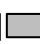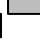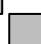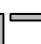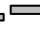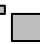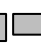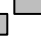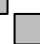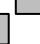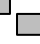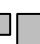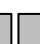

PC Experiment

# mediumpurple3

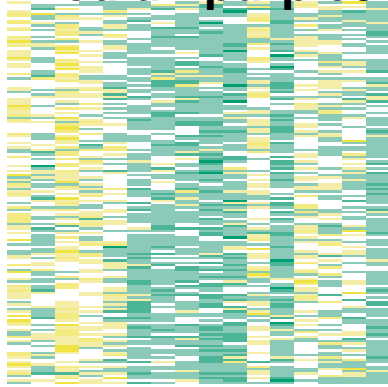

C1

C3

F11

F13

FP1

FP3

P11

P13

eigengene expression

0.2  
-0.2

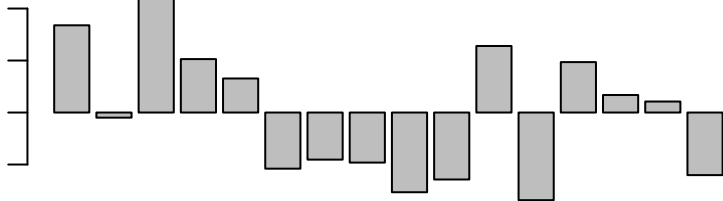

HC Experiment

violet

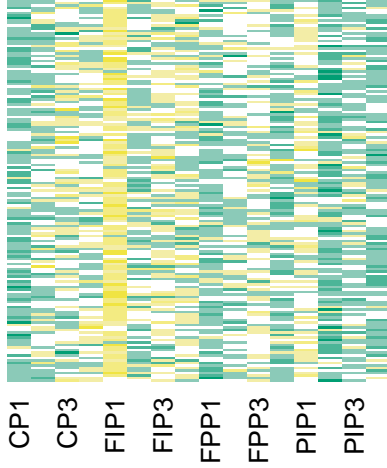

eigengene expression

-0.2 0.2 0.6

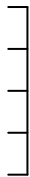

PC Experiment

violet

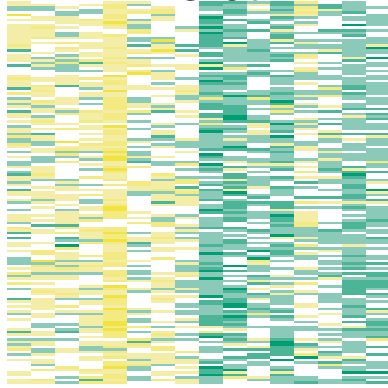

C1

C3

F11

F13

FP1

FP3

P11

P13

eigengene expression

0.4  
0.0  
-0.4

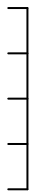

HC Experiment



**maroon**

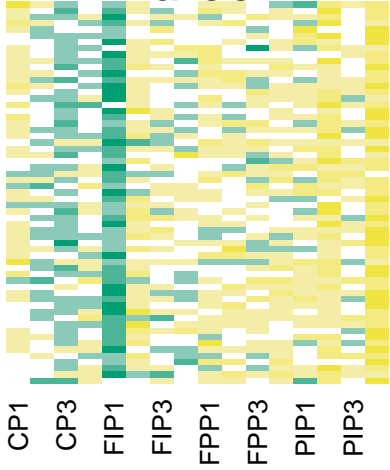

eigengene expression

0.4  
0.0  
-0.6

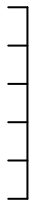

PC Experiment

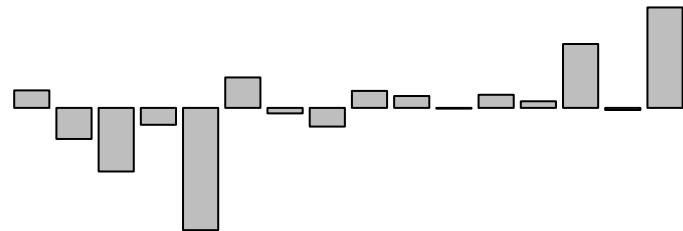

maroon

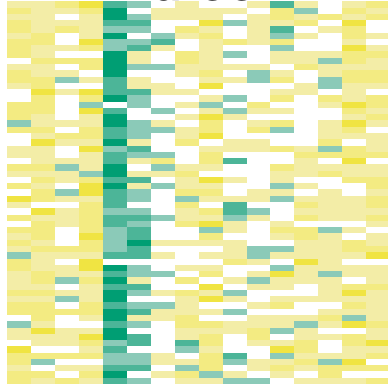

C1

C3

F1

F3

FP1

FP3

P1

P3

eigengene expression

-0.6  
0.0

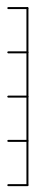

HC Experiment

lightgreen

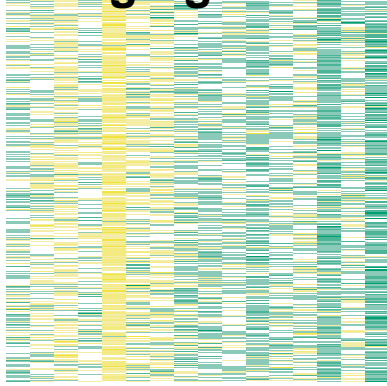

CP1

CP3

FIP1

FIP3

FPP1

FPP3

PIP1

PIP3

eigengene expression

0.4  
0.0  
-0.4

PC Experiment

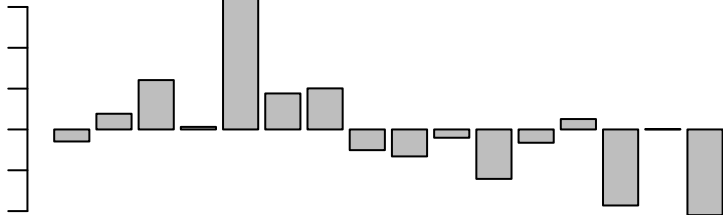

lightgreen

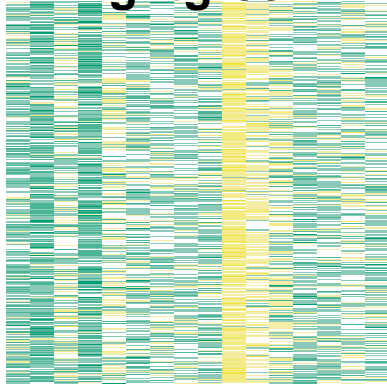

C1

C3

F11

F13

FP1

FP3

P11

P13

eigengene expression

-0.4  
0.0  
0.4

HC Experiment

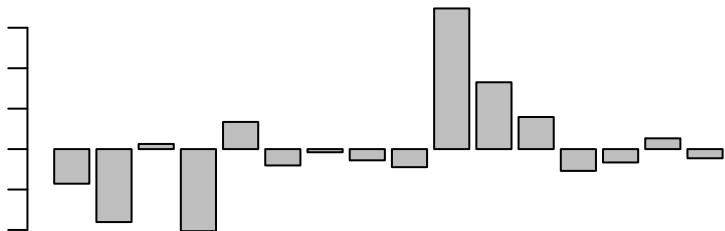



plum2

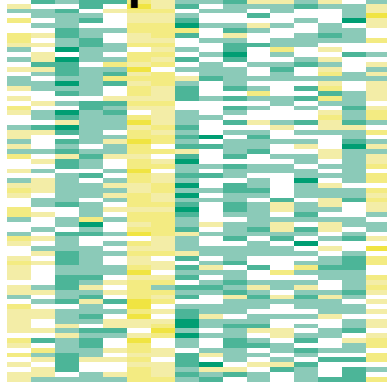

CP1

CP3

FIP1

FIP3

FPP1

FPP3

PIP1

PIP3

eigengene expression

0.2  
-0.2

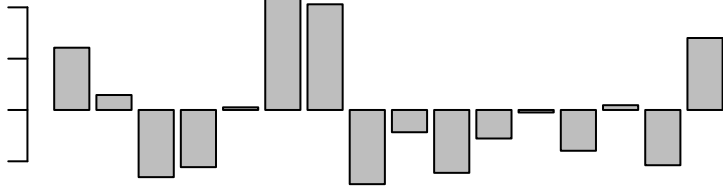

PC Experiment

plum2

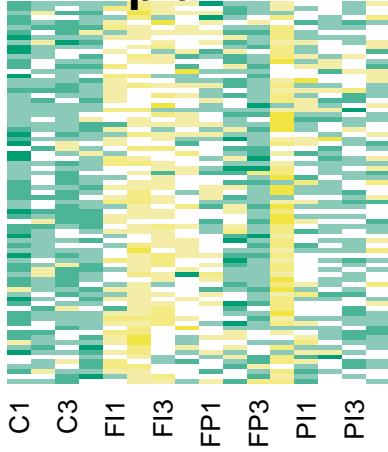

eigengene expression

-0.2 0.2

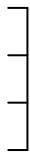

HC Experiment

lightyellow

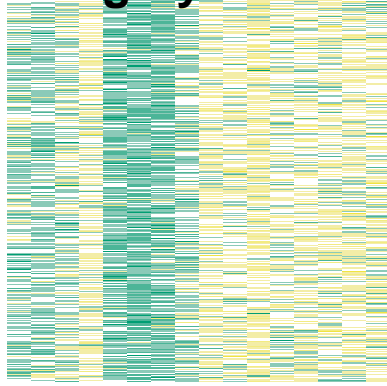

CP1

CP3

FIP1

FIP3

FPP1

FPP3

PIP1

PIP3

eigengene expression

-0.4  
0.0

PC Experiment

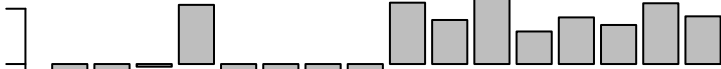

lightyellow

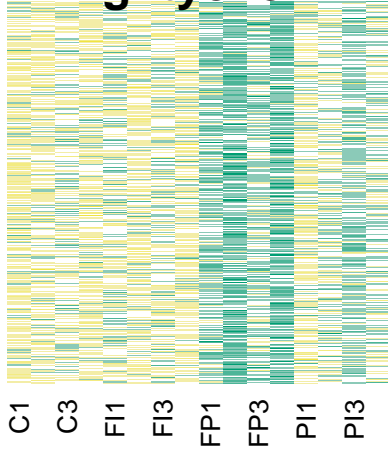

eigengene expression

-0.4  
0.0

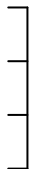

HC Experiment



# darkturquoise

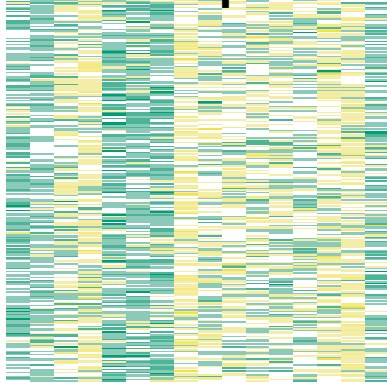

CP1

CP3

FIP1

FIP3

FPP1

FPP3

PIP1

PIP3

eigengene expression

-0.4  
0.0  
0.3

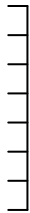

PC Experiment

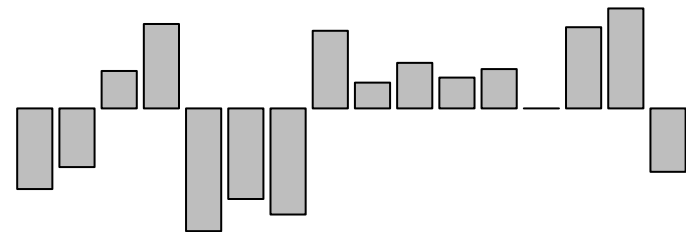

**darkturquoise**

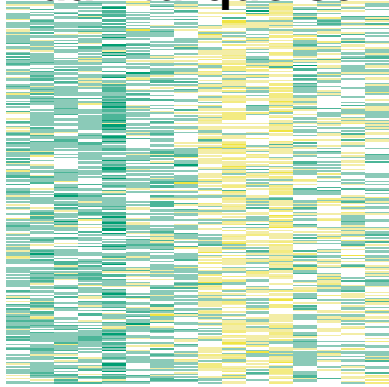

C1

C3

F11

F13

FP1

FP3

P11

P13

eigengene expression

-0.4  
0.0  
0.4

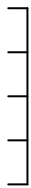

HC Experiment

**darkslateblue**

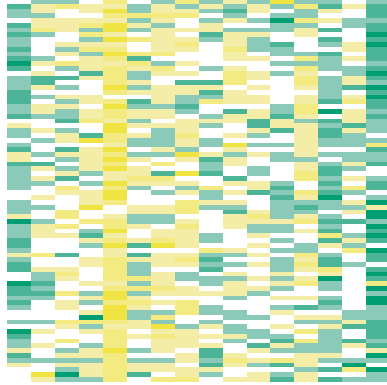

CP1

CP3

FIP1

FIP3

FPP1

FPP3

PIP1

PIP3

eigengene expression

-0.4  
0.2  
0.6

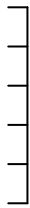

PC Experiment

**darkslateblue**

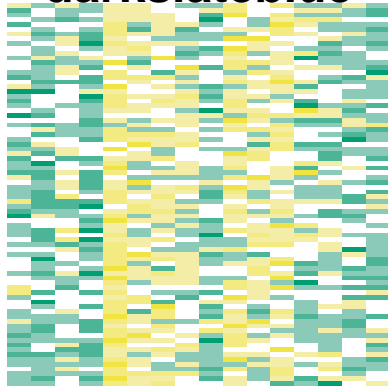

C1

C3

F1

F3

FP1

FP3

P1

P3

eigengene expression

-0.2 0.2

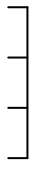

HC Experiment



**cyan**

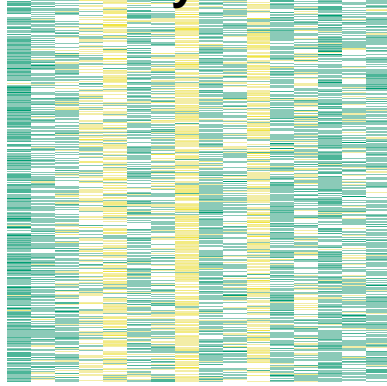

CP1

CP3

FIP1

FIP3

FPP1

FPP3

PIP1

PIP3

eigengene expression

-0.2 0.2

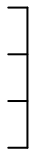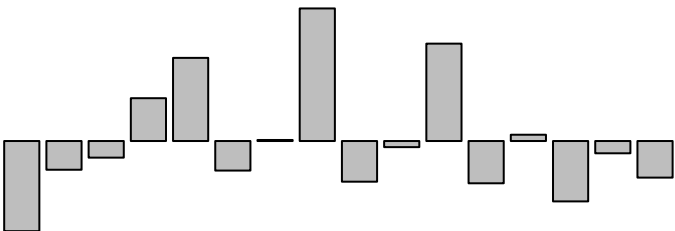

PC Experiment

**cyan**

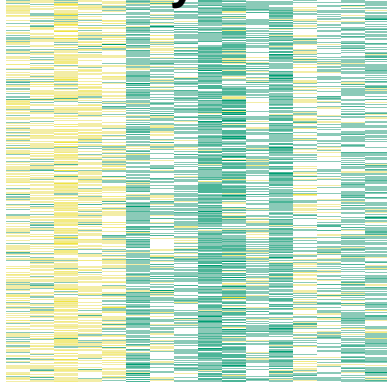

C1

C3

F11

F13

FP1

FP3

P11

P13

eigengene expression

0.2  
-0.2

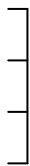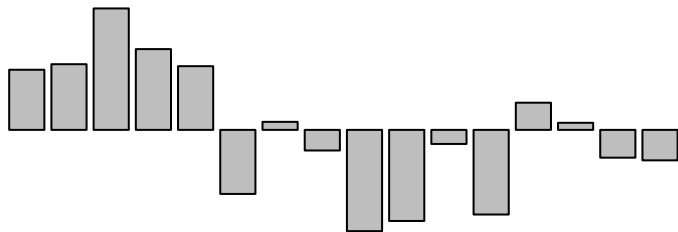

HC Experiment

orange

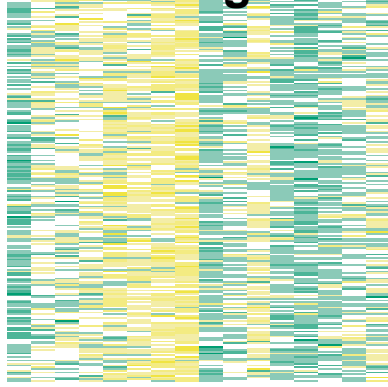

CP1

CP3

FIP1

FIP3

FPP1

FPP3

PIP1

PIP3

eigengene expression

-0.2 0.2

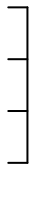

PC Experiment

orange

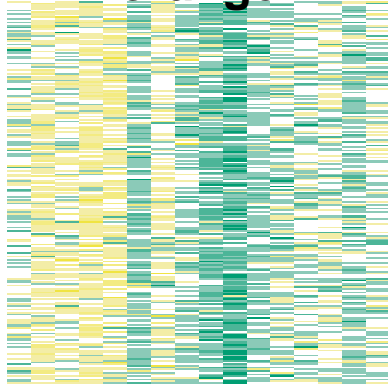

C1

C3

F11

F13

FP1

FP3

P11

P13

eigengene expression

-0.4 0.0

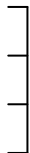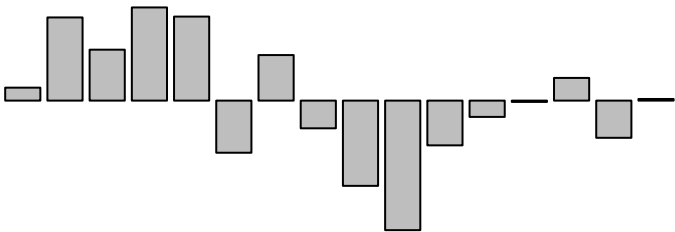

HC Experiment



# sienna3

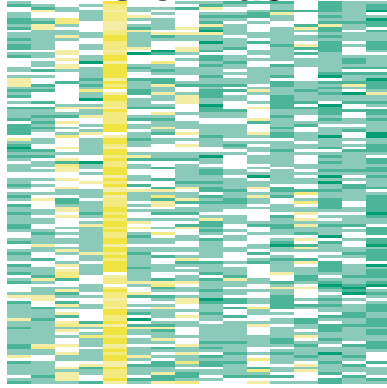

CP1

CP3

FIP1

FIP3

FPP1

FPP3

PIP1

PIP3

eigengene expression

-0.2 0.4 0.8

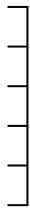

PC Experiment

# sienna3

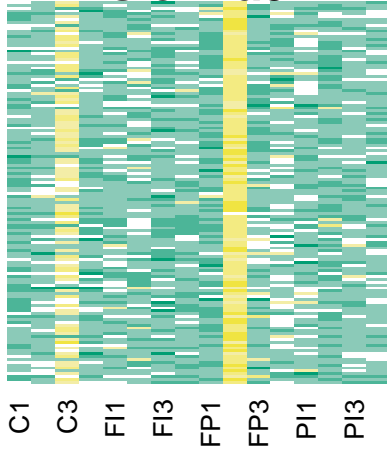

eigengene expression

0.8  
0.4  
0.0

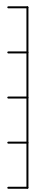

HC Experiment

# lightsteelblue1

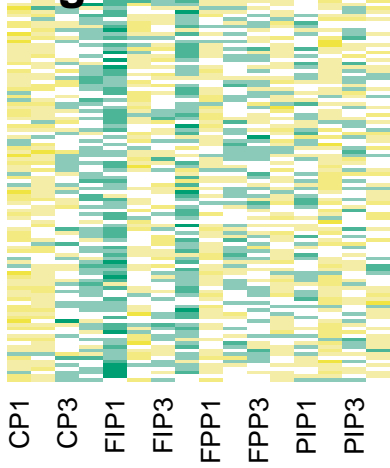

eigengene expression

-0.4 0.0

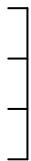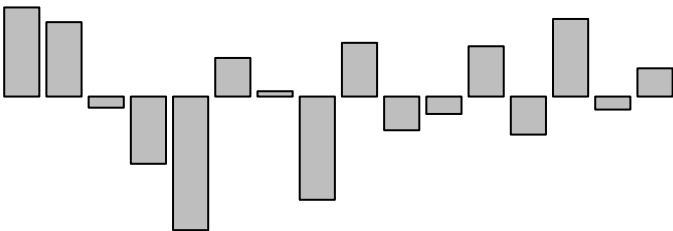

PC Experiment

lightsteelblue1

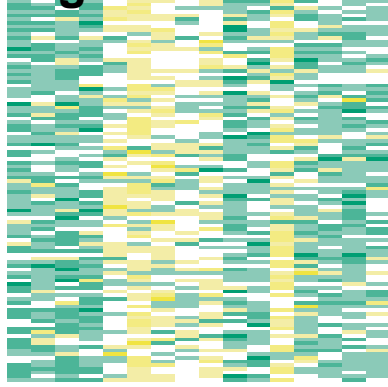

C1

C3

F11

F13

FP1

FP3

P11

P13

eigengene expression

-0.2  
0.2

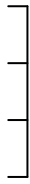

HC Experiment



# lightcyan1

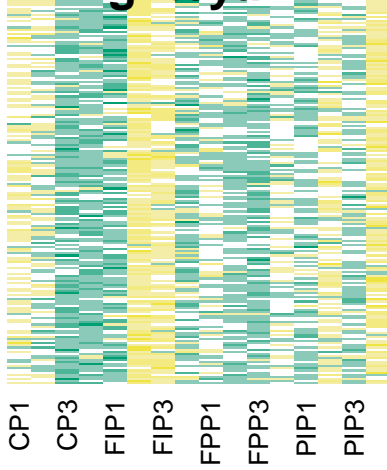

eigengene expression

0.2  
-0.2

PC Experiment

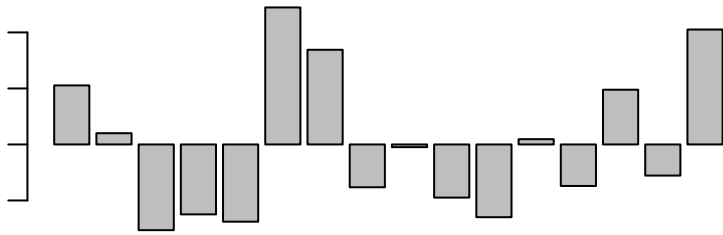

# lightcyan1

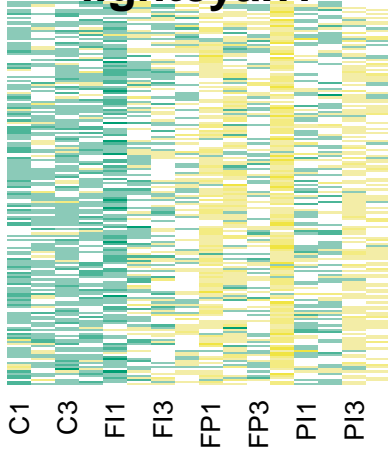

eigengene expression

-0.2 0.2

HC Experiment

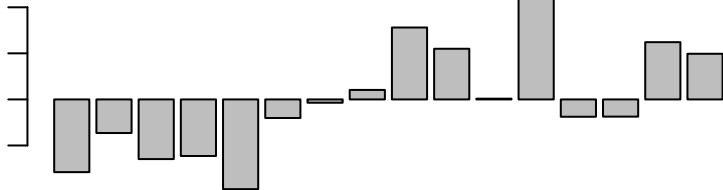

# thistle2

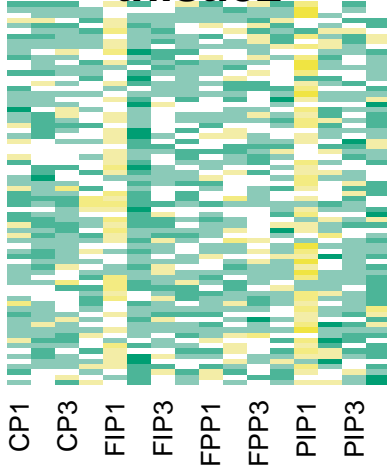

eigengene expression

0.4  
-0.2

PC Experiment

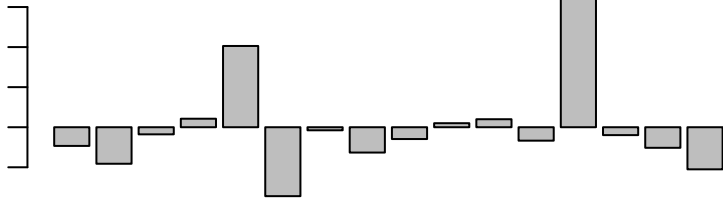

# thistle2

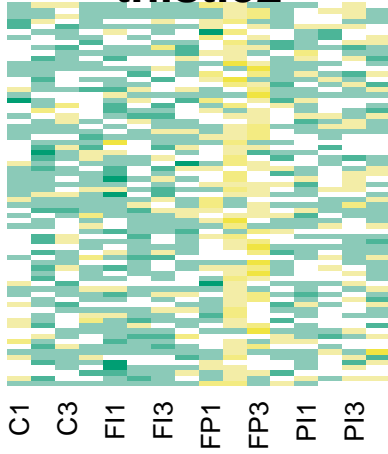

eigengene expression

-0.2 0.2 0.6

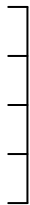

HC Experiment



**thistle1**

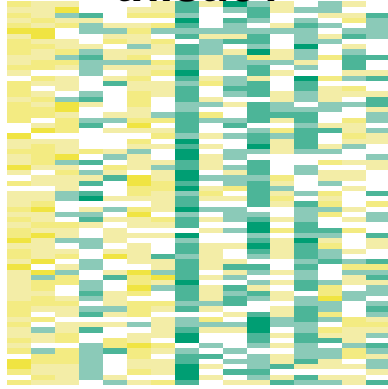

CP1

CP3

FIP1

FIP3

FPP1

FPP3

PIP1

PIP3

eigengene expression

-0.4 0.0

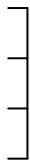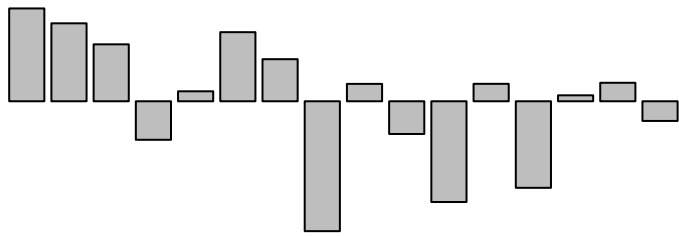

PC Experiment

**thistle1**

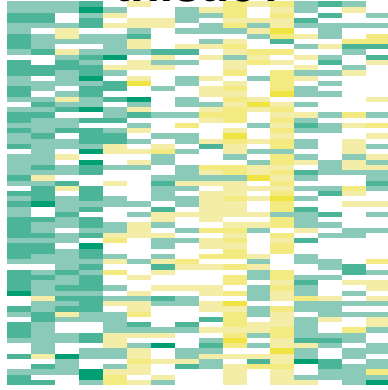

C1

C3

F11

F13

FP1

FP3

P11

P13

eigengene expression

-0.4  
0.0  
0.4

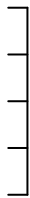

HC Experiment

# floralwhite

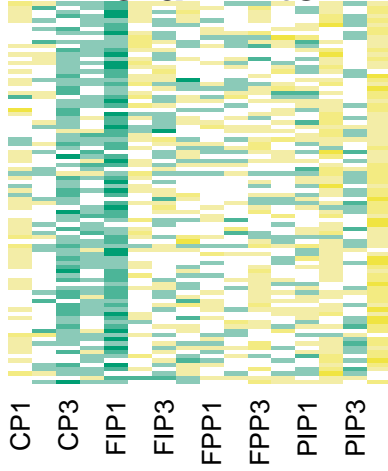

eigengene expression

0.4  
0.0  
-0.4

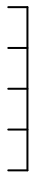

PC Experiment

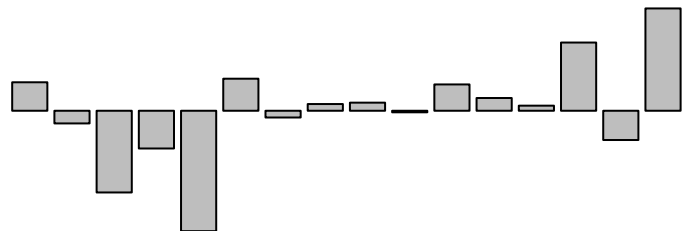

# floralwhite

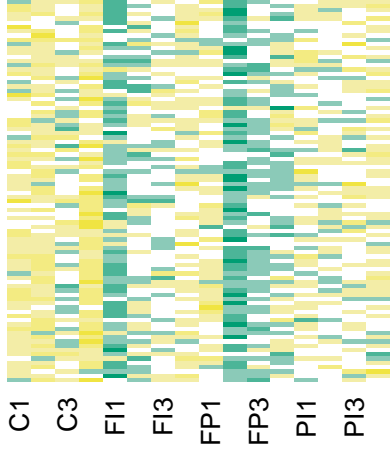

eigengene expression

0.4  
0.0  
-0.4

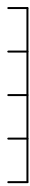

HC Experiment





eigengene expression

-0.2 0.2

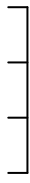

PC Experiment



eigengene expression

-0.8  
-0.2

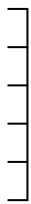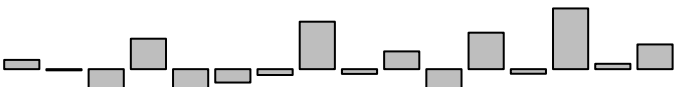

HC Experiment



eigengene expression

0.4  
0.0  
-0.4

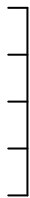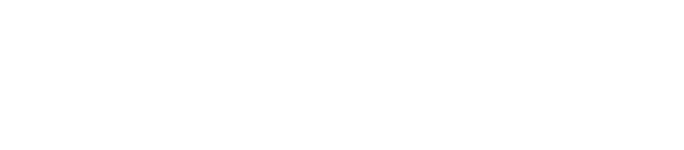

PC Experiment

# coral1

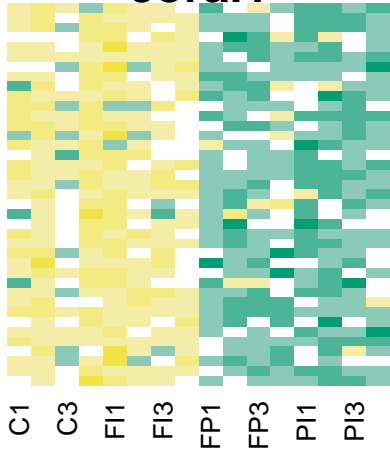

eigengene expression

0.3  
0.0  
-0.3

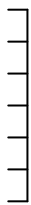

HC Experiment





eigengene expression

-0.4  
0.0  
0.4

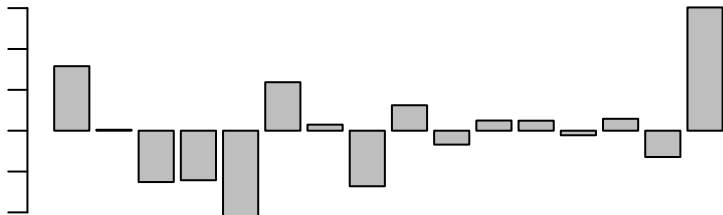

PC Experiment

# honeydew1

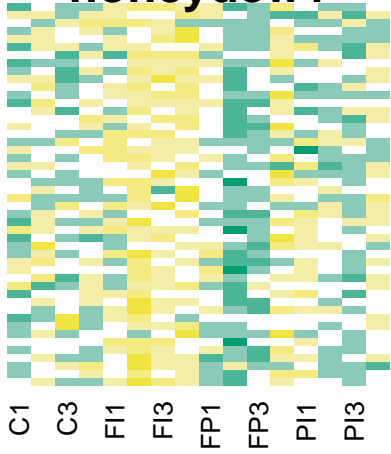

eigengene expression

-0.4  
0.0  
0.4

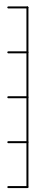

HC Experiment
